# Supplementary material for: Source Apportionment of PM 2.5 in Montréal, Canada and Health Risk Assessment for Potentially Toxic Elements
Source: Copernicus journal article supplement (doi:10.5194/egusphere-2023-1039), 2023-06-07
Supplement: Supplementary file 1 [file egusphere-2023-1039-supplement.pdf]

## SUPPLEMENTARY INFORMATION

### Source Apportionment of PM<sub>2.5</sub> in Montréal, Canada and Health Risk Assessment for Potentially Toxic Elements

Nansi Fakhri <sup>a,b</sup>, Robin Stevens <sup>b</sup>, Arnold Downey <sup>b</sup>, Konstantina Oikonomou <sup>c</sup>, Jean Sciare <sup>c</sup>,  
Charbel Afif\* <sup>a,c</sup>, Patrick L. Hayes\* <sup>b</sup>

<sup>a</sup> EMMA Research Group, Centre d'Analyses et de Recherche, Faculty of Sciences, Université Saint-Joseph, Beirut, Lebanon

<sup>b</sup> Department of Chemistry, Faculty of Arts and Sciences, Université de Montréal, Montréal, Québec, Canada

<sup>c</sup> Climate and Atmosphere Research Center (CARE-C), The Cyprus Institute, Nicosia, Cyprus

**Table S1:** Values of the cancer slope factor (CSF) and inhalation unit risk (IUR).

|               | Cancer slope factor (CSF)<br>(kg·day/mg) |           |            | Inhalation unit risk<br>(IUR)<br>(m <sup>3</sup> /mg) |
|---------------|------------------------------------------|-----------|------------|-------------------------------------------------------|
|               | Dermal                                   | Ingestion | Inhalation |                                                       |
| <b>Co</b>     |                                          |           | 9.8        | 9                                                     |
| <b>Cr(VI)</b> | 20                                       | 0.5       | 41         | 84                                                    |
| <b>Ni</b>     |                                          |           | 0.84       | 0.26                                                  |
| <b>V</b>      |                                          |           |            | 8.3                                                   |
| <b>Cd</b>     |                                          |           | 6.3        | 1.8                                                   |
| <b>Pb</b>     | 0.0085                                   | 0.0085    | 0.042      | 0.000012                                              |

**Table S2:** Displacement error estimation and mapping of bootstrap factors to constrained factors for the PMF model.

EPA PMF

Model Data | Base Model | Rotational Tools | Help

Base Model Runs | Base Model Results | Base Model DISP Results | Error Estimation Summary

DISP Box Plots | DISP Summary

```

0          0.000
0 0 0 0 0 0 0 0 0 0 0 0
0 0 0 0 0 0 0 0 0 0 0 0
0 0 0 0 0 0 0 0 0 0 0 0
0 0 0 0 0 0 3 0 0 0 2 3
  
```

In the first line the first value is an error code: 0 means no error; 6 or 9 indicates that the run was aborted. If this first value is non-zero, the DISP analysis results are considered invalid. The second value is the largest observed drop of Q during DISP.

Below the first line is a table (four lines) which contains swap counts for factors (columns) for each dQmax level (rows). The first row is for dQmax = 4, the second row dQmax=8, the third dQmax=15 and the fourth dQmax=25. If any swaps are present for dQmax=4, the solution has a large amount of rotational ambiguity and caution should be used if interpreting the solution.

Results for dQmax=4 are graphed in the DISP box plot tab. Detailed DISP results are included in the \*\_DISPres1-4.txt files (corresponding to the four dQmax levels) in the output folder.

Note: DISP intervals include effects of rotational ambiguity. They do not include effects of random errors in the data. For modeling errors, if user misspecifies the uncertainty of the concentration data, DISP intervals are directly impacted. Hence intervals for downweighted or "weak" species are likely too long.

EPA PMF

Model Data | Base Model | Rotational Tools | Help

Base Model Runs | Base Model Results | Base Model Bootstrap Results | Error Estimation Summary

Bootstrap Box Plots | Bootstrap Summary

```

Base model run number: 20
Number of bootstrap runs: 100
Bootstrap random seed: 72
Min. Correlation R-Value: 0.6
Number of factors: 11
Extra modeling uncertainty (%): 0

Mapping of bootstrap factors to base factors:

Boot Factor 1  Factor 1  Factor 2  Factor 3  Factor 4  Factor 5  Factor 6  Factor 7  Factor 8  Factor 9  Factor 10  Factor 11  Unmapped
Boot Factor 2  100      0        0        0        0        0        0        0        0        0        0        0
Boot Factor 3  3        95       0        0        0        0        2        0        0        0        0        0
Boot Factor 4  0        1        83       9        0        4        0        0        1        0        1        1
Boot Factor 5  0        0        0        100      0        0        0        0        0        0        0        0
Boot Factor 6  0        0        0        0        100     0        0        0        0        0        0        0
Boot Factor 7  1        1        0        0        0        98       0        0        0        0        0
Boot Factor 8  0        0        0        0        0        0        100     0        0        0        0
Boot Factor 9  0        0        0        0        0        0        0        100     0        0        0
Boot Factor 10 0        0        0        0        0        0        0        0        100     0        0
Boot Factor 11 0        0        0        0        0        0        0        0        0        100     0
  
```

Q (Robust) Percentile Report:

| Min | 25th | Median | 75th | Max |
|-----|------|--------|------|-----|
| 68  | 90   | 104    | 114  | 133 |

In order to reduce the range of the meaningful number of factors, two parameters was calculated: the maximum individual mean (IM) and the maximum individual standard deviation (IS) where (Lee et al., 1999):

$$IM = \max_{j=1 \dots m} \left( \frac{1}{n} \sum_{i=1}^n r_{ij} \right) \quad \text{and} \quad IS = \max_{j=1 \dots m} \left( \sqrt{\frac{1}{n-1} \sum_{i=1}^n (r_{ij} - \bar{r}_j)^2} \right)$$

$$r_{ij} = \frac{e_{ij}}{s_{ij}}$$

When the number of factors increases to a critical value, IM and IS will show a drastic drop.

Graphical representations of the IM and IS (**Fig. S6- 1**) revealed a steady drop in their values as the number of factors increased and a stabilization starting with the 11-factor solution. Moreover, a 12-factor solution resolved a phantom factor that could not be definitively linked to a particular source, while a 10-factor solution consolidated two sources into a single factor.

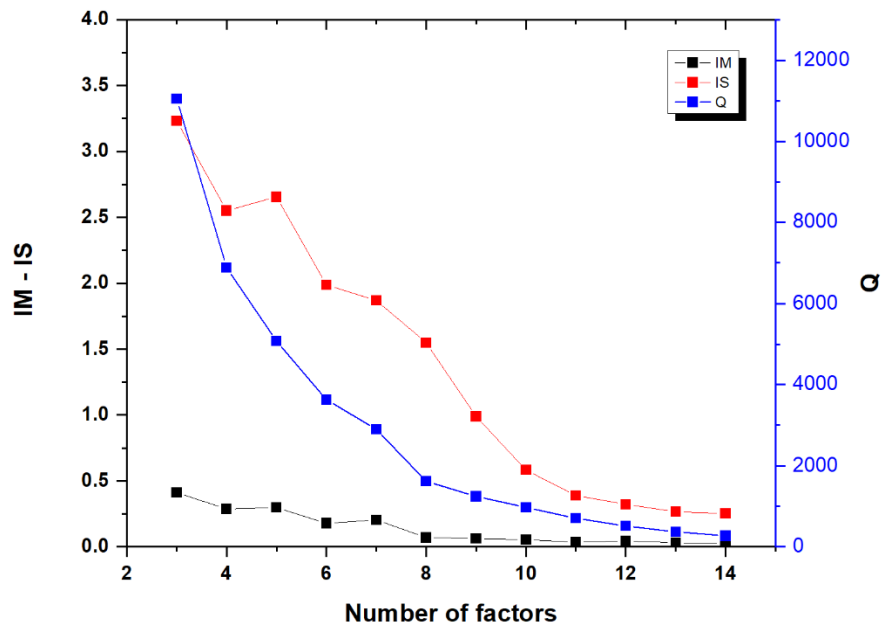

**Fig. S1:** IM, IS and Q-values for Hersh and USJ sites.

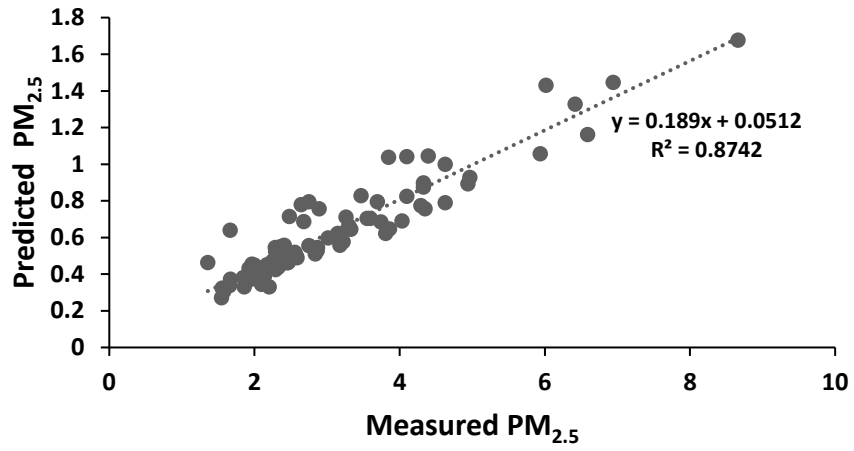

**Fig. S2:** Measured versus predicted PM<sub>2.5</sub> concentrations.

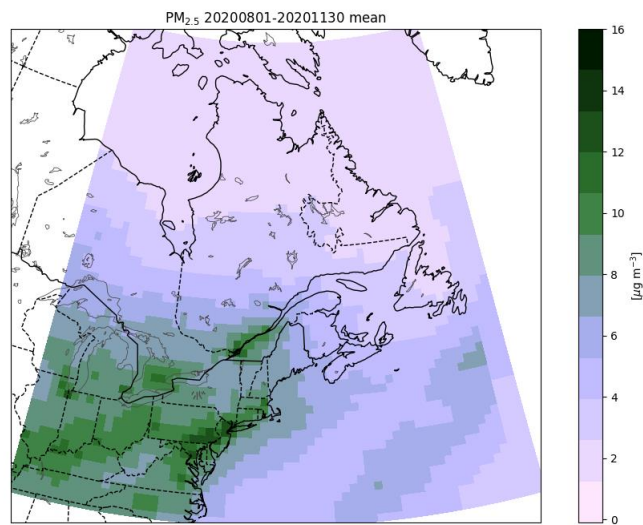

**Fig. S3:** Mean concentrations of PM<sub>2.5</sub> from the base case 0.5x0.625 nested GEOS-Chem simulation.

## Evaluation of GEOS-Chem against measurements

The model performance was evaluated for  $\text{PM}_{2.5}$ ,  $\text{SO}_4^{2-}$ ,  $\text{NO}_3^-$ ,  $\text{NH}_4^+$ , OC and EC and the results are summarized in **Table S3**. The metrics used for the evaluation were: Pearson's correlation coefficient (R), mean error (ME), normalized mean error (NME), mean bias (MB), and normalized mean bias (NMB). ME, NME, MB, and NMB are calculated following the Eqs. 1-4, where  $x_i$  indicates the model predictions and  $y_i$  indicates the observed data for a given month and station, both as daily averages, and N is the number of model-observation pairs:

$$\text{ME} = \frac{1}{N} \sum_{i=1}^N |x_i - y_i| \quad (\text{Eq. 1})$$

$$\text{NME} = \frac{1}{N} \sum_{i=1}^N \frac{|x_i - y_i|}{y_i} \cdot 100 \quad (\text{Eq. 2})$$

$$\text{MB} = \frac{1}{N} \sum_{i=1}^N x_i - y_i \quad (\text{Eq. 3})$$

$$\text{NMB} = \frac{1}{N} \sum_{i=1}^N \frac{(x_i - y_i)}{y_i} \cdot 100 \quad (\text{Eq. 4})$$

**Table S3:** Evaluation of the GEOS-Chem base case simulation vs measurements from our measurement site.

| Pollutants                                  | R    | ME   | NME [%] | MB   | NMB [%] |
|---------------------------------------------|------|------|---------|------|---------|
| $\text{PM}_{2.5}$ ( $\mu\text{g m}^{-3}$ )  | 0.63 | 4.69 | 141.08  | 4.46 | 133.98  |
| $\text{SO}_4^{2-}$ ( $\mu\text{g m}^{-3}$ ) | 0.24 | 0.43 | 77.14   | 0.18 | 32.39   |
| $\text{NO}_3^-$ ( $\mu\text{g m}^{-3}$ )    | 0.56 | 0.30 | 107.92  | 0.11 | 40.95   |
| $\text{NH}_4^+$ ( $\mu\text{g m}^{-3}$ )    | 0.46 | 0.23 | 89.09   | 0.15 | 57.08   |
| OC ( $\mu\text{g m}^{-3}$ )                 | 0.76 | 0.89 | 51.46   | 0.11 | 41.02   |
| EC ( $\mu\text{g m}^{-3}$ )                 | 0.57 | 0.16 | 58.84   | 0.01 | 2.89    |

We note that significant errors are expected due to the differences in spatial extent of the model resolution (0.5 degrees latitude by 0.625 degrees longitude) versus the observations (essentially a point measurement) as discussed by Schutgens et al. (2016). However, this bias is expected to affect all of the sensitivity simulations in a similar way and would not affect the relative differences between simulations that we use to help interpret the results of the PMF analysis. Furthermore, GEOS-Chem results have been previously used for source contribution analysis similar to the analysis presented in this study (Meng et al. 2019).

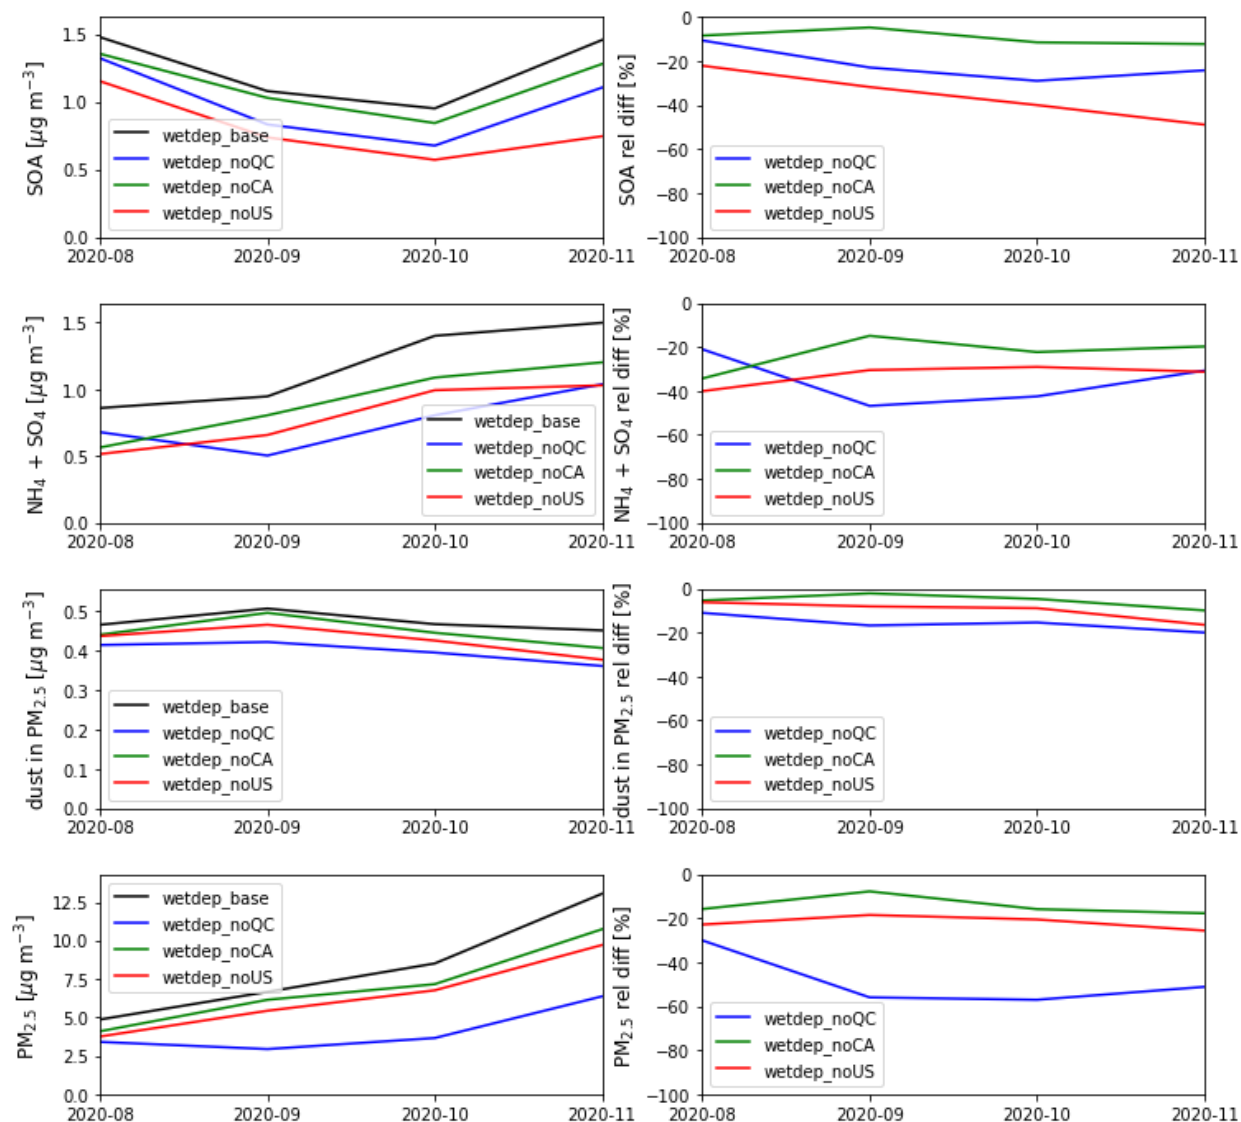

**Fig. S4:** GEOS-Chem simulations of (top) SOA, (middle 1) the sum of ammonium and sulfate concentrations, (middle 2) dust in  $\text{PM}_{2.5}$ , and (bottom)  $\text{PM}_{2.5}$ . The labels noQC, noCA, and noUS refer to simulations without anthropogenic emissions from Quebec, the rest of Canada, and the US, respectively.

## Chemical mass closure

A chemical mass closure study was performed using the chemical composition measurements to estimate the contributions of the different components to the total PM<sub>2.5</sub> mass concentration following the method reported by Fakhri et al. (2022). Briefly, the contribution of sea salt is calculated by summing the six major ions (Sciare et al., 2005):

$$[\text{Sea salt}] = [\text{Na}^+] + [\text{Cl}^-] + [\text{ss} - \text{Mg}^{2+}] + [\text{ss} - \text{K}^+] + [\text{ss} - \text{Ca}^{2+}] + [\text{ss} - \text{SO}_4^{2-}] \quad (\text{Eq. 5})$$

Ionic constituents such as K<sup>+</sup>, Ca<sup>2+</sup>, Mg<sup>2+</sup> and SO<sub>4</sub><sup>2-</sup> are derived from both marine and non-marine sources. Therefore, it is necessary to discriminate sea salt (ss) from non-sea salt (nss) contributions. Assuming that all sodium ions are of marine origin, the sea salt contribution can be calculated based on sea water composition as shown in Eqs. 6 - 9 (Genga et al., 2017; Sciare et al., 2005). Furthermore, non-sea salt potassium, calcium, magnesium and sulfate (nss-K<sup>+</sup>, nss-Ca<sup>2+</sup>, nss-Mg<sup>2+</sup> and nss-SO<sub>4</sub><sup>2-</sup>) are calculated by subtracting the sea-salt fraction (ss-K<sup>+</sup>, ss-Ca<sup>2+</sup>, ss-Mg<sup>2+</sup> and ss-SO<sub>4</sub><sup>2-</sup>, respectively) from the total concentration of the ions (K<sup>+</sup>, Ca<sup>2+</sup>, Mg<sup>2+</sup> and SO<sub>4</sub><sup>2-</sup>, respectively).

$$[\text{ss} - \text{SO}_4^{2-}] = 0.252 \times [\text{Na}^+] \quad (\text{Eq. 6})$$

$$[\text{ss} - \text{Ca}^{2+}] = 0.038 \times [\text{Na}^+] \quad (\text{Eq. 7})$$

$$[\text{ss} - \text{K}^+] = 0.036 \times [\text{Na}^+] \quad (\text{Eq. 8})$$

$$[\text{ss} - \text{Mg}^{2+}] = 0.119 \times [\text{Na}^+] \quad (\text{Eq. 9})$$

In addition, secondary inorganic aerosol (SIA) is represented by the sum of nss-SO<sub>4</sub><sup>2-</sup>, NH<sub>4</sub><sup>+</sup> and NO<sub>3</sub><sup>-</sup>. To take bound water into account a hydration multiplication factor of 1.29 was applied to convert the dry inorganic concentrations (SIA and sea salt) into hydrated species (Sciare et al., 2005; Genga et al., 2017).

The contribution of crustal matter (CM) (Eq. 10) was estimated by summing the concentrations of aluminum, silicon, calcium, iron, and titanium in their oxide forms (Huang et al., 2014). The coefficients in front of the elements correspond to the additional mass due to oxygen in the minerals. Silicon was not measured in this study and was indirectly determined by multiplying the measured aluminum concentration by a factor of 3.41 (Esmailirad et al., 2020). This factor is obtained from the ratio of Si and Al in the Earth's crust following Mason and Moore (1982).

$$[\text{CM}] = 2.2 [\text{Al}] + 2.49 [\text{Si}] + 1.63 [\text{Ca}] + 2.42 [\text{Fe}] + 1.94 [\text{Ti}] \quad (\text{Eq. 10})$$

To find the optimal CF to calculate OM from OC, the factor was varied from 1.2 to 2.1. The Pearson correlation (R) calculated between the reconstructed PM<sub>2.5</sub> and the measured mass did not change significantly (0.978-0.979), but the highest correlation and the slope closest to 1 was obtained with CF=1.6. The results of chemical mass closure study are shown in Fig. S5.



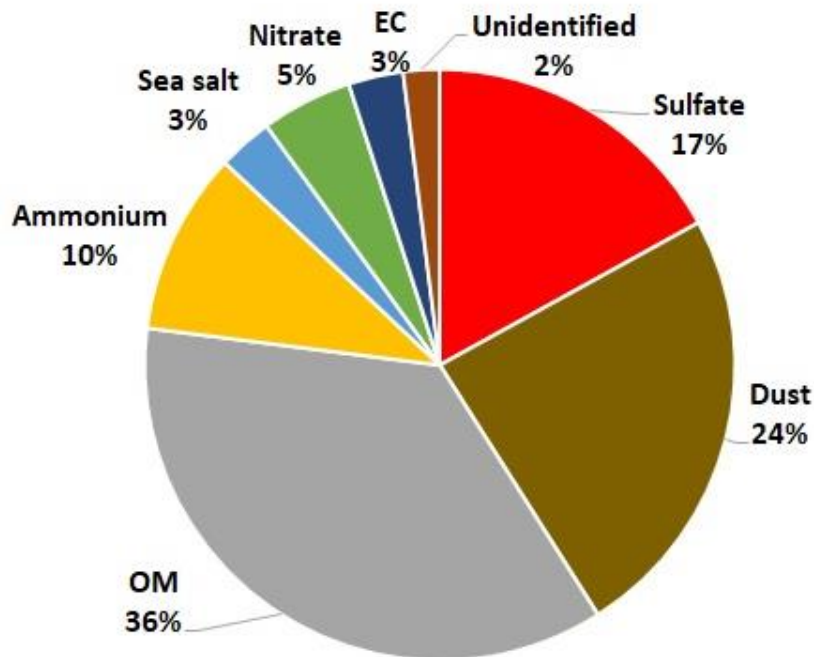

**Fig. S5:** Percent source contributions determined by chemical mass closure.

### The indexes for the n-alkanes

Overall CPI and high CPI were calculated using the concentrations of n-alkanes following the Eq. 11 and 12 (Bray and Evans, 1961; Cooper and Bray, 1963; Fadel et al., 2021):

$$\text{Overall CPI} = \frac{\sum \text{odd C15-C29}}{\sum \text{even C16-C30}} \quad (\text{Eq. 11})$$

$$\text{High CPI} = \frac{\sum \text{odd C25-C29}}{\sum \text{even C26-C30}} \quad (\text{Eq. 12})$$

Biogenic sources emit larger amounts of odd carbon number alkanes than even carbon number alkanes, resulting in an Overall CPI greater than 6. Petrogenic emissions, on the other hand, have no carbon preference and have an Overall CPI value close to 1, whereas biomass burning has a value between 2 and 5 (Haque et al., 2019; Li et al., 2010; Fadel et al., 2021). When only the higher

molecular weight n-alkanes are considered, anthropogenic sources have CPI values below 1.5, while biogenic sources have CPI values higher than 3 (Caumo et al., 2020; Kang et al., 2020).

Furthermore, wax n-alkane concentrations were used to assess the relative contributions of biogenic and anthropogenic sources. The concentrations of wax n-alkanes (WNA), in the C14 to C30 range, and its percentage (%WNA) were calculated using the following equations (Fadel et al., 2021):

$$\text{WNA}_n = C_n - 0.5(C_{n-1} + C_{n+1}) \quad (\text{Eq. 13})$$

$$\% \text{WNA} = \frac{\sum \text{WNA}}{\sum \text{NA}} \times 100 \quad (\text{Eq. 14})$$

where  $C_n$  is the odd carbon congener,  $\sum \text{WNA}$  is the sum of wax n-alkane concentrations and  $\sum \text{NA}$  is the total concentration of n-alkanes. The %WNA value of  $7.95 \pm 4.93\%$  was indicative of smaller relative inputs from biogenic sources compared to the anthropogenic ones. Hence, the Overall CPI, High CPI and %WNA all appear to depict a similar picture of the anthropogenic origins of n-alkanes.

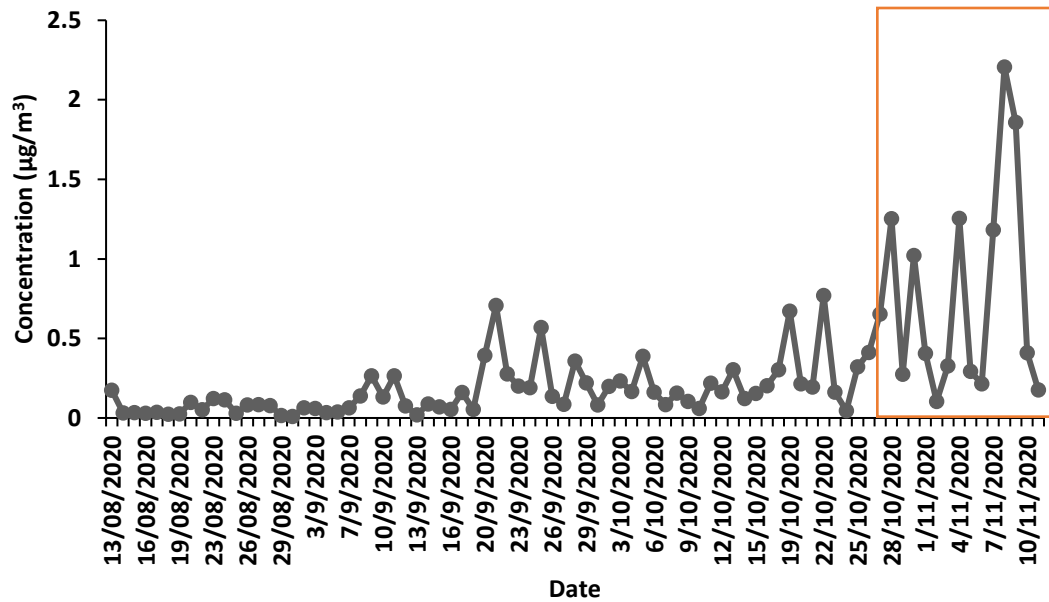

**Fig. S6:** The temporal variation of nitrate concentrations for the sampling period at MTL site.

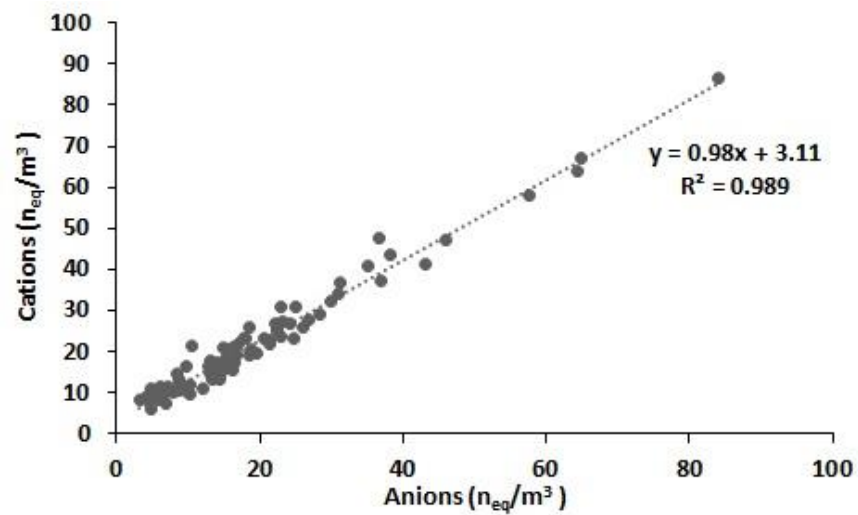

**Fig. S7:** Ion balance evaluation between the water-soluble ions (Cations:  $\text{Na}^+$ ,  $\text{Mg}^{2+}$ ,  $\text{NH}_4^+$ ,  $\text{K}^+$ ,  $\text{Ca}^{2+}$  and anions:  $\text{SO}_4^{2-}$ ,  $\text{NO}_3^-$ ,  $\text{Cl}^-$ ).

## **References**

- Bray, E.E., Evans, E.D., 1961. Distribution of n-paraffins as a clue to recognition of source beds. *Geochim. Cosmochim. Acta* 22, 2–15. [https://doi.org/10.1016/0016-7037\(61\)90069-2](https://doi.org/10.1016/0016-7037(61)90069-2)
- Caumo, S., Bruns, R.E., Vasconcellos, P.C., 2020. Variation of the distribution of atmospheric n-alkanes emitted by different fuels' combustion. *Atmos.* 11, 1–19. <https://doi.org/10.3390/atmos11060643>
- Cooper, J.E., Bray, E.E., 1963. A postulated role of fatty acids in petroleum formation. *Geochim Cosmochim. Acta* 27, 1113–1127. doi:10. 1016/0016-7037(63)90093-0
- Fadel, Marc, Ledoux, F., Farhat, M., Kfoury, A., Courcot, D., Afif, C., 2021. PM2.5 characterization of primary and secondary organic aerosols in two urban-industrial areas in the East Mediterranean. *J. Environ. Sci. (China)* 101, 98–116. <https://doi.org/10.1016/j.jes.2020.07.030>
- Genga, A., Ielpo, P., Siciliano, T., Siciliano, M., 2017. Carbonaceous particles and aerosol mass closure in PM2.5 collected in a port city. *Atmos. Res.* 183, 245–254.
- Haque, M.M., Kawamura, K., Deshmukh, D.K., Fang, C., Song, W., Mengying, B., Zhang, Y.L., 2019. Characterization of organic aerosols from a Chinese megacity during winter: Predominance of fossil fuel combustion. *Atmos. Chem. Phys.* 19, 5147–5164. <https://doi.org/10.5194/acp-19-5147-2019>
- Huang, X.H.H., Bian, Q., Ng, W.M., Louie, P.K.K., Yu, J.Z., 2014. Characterization of PM2.5 major components and source investigation in suburban Hong Kong: A one year monitoring study. *Aerosol Air Qual. Res.* 14, 237–250.
- Kang, M., Kim, K., Choi, N., Kim, Y.P., Lee, J.Y., 2020. Recent occurrence of PAHs and n-Alkanes in pm2.5 in Seoul, Korea and characteristics of their sources and toxicity. *Int. J. Environ. Res. Public Health* 17. <https://doi.org/10.3390/ijerph17041397>
- Lee, E., Chan, C.K., Paatero, P., 1999. Application of positive matrix factorization in source apportionment of particulate pollutants in Hong Kong. *Atmos. Environ.* 33, 3201–3212. [https://doi.org/10.1016/S1352-2310\(99\)00113-2](https://doi.org/10.1016/S1352-2310(99)00113-2)

Li, W., Peng, Y., Bai, Z., 2010. Distributions and sources of n-alkanes in PM<sub>2.5</sub> at urban, industrial and coastal sites in Tianjin, China. *J. Environ. Sci.* 22, 1551–1557. [https://doi.org/10.1016/S1001-0742\(09\)60288-6](https://doi.org/10.1016/S1001-0742(09)60288-6)

Mason, B., Moore, C.B., 1982. *Principles of Geochemistry*, fourth edition. Wiley.

Meng, J., Martin, R. V., Li, C., van Donkelaar, A., Tzompa-Sosa, Z. A., Yue, X., Xu, J.-W., Weagle, C. L., and Burnett, R. T.: Source Contributions to Ambient Fine Particulate Matter for Canada, *Environ. Sci. Technol.*, 53, 10269–10278, <https://doi.org/10.1021/acs.est.9b02461>, 2019.

Sciare, J., Oikonomou, K., Cachier, H., Mihalopoulos, N., Andreae, M.O., Maenhaut, W., et al., 2005. Aerosol mass closure and reconstruction of the light scattering coefficient over the Eastern Mediterranean Sea during the MINOS campaign. *Atmos. Chem. Phys. Discuss.* 5, 2427–2461.

Schutgens, N. A. J., Gryspeerdt, E., Weigum, N., Tsyro, S., Goto, D., Schulz, M., and Stier, P.: Will a perfect model agree with perfect observations? The impact of spatial sampling, *Atmos. Chem. Phys.*, 16, 6335–6353, <https://doi.org/10.5194/acp-16-6335-2016>, 2016.
